# Supplementary material for: Extensive conservation of ancient microsynteny across metazoans due to cis-regulatory constraints
Source: HighWire-hosted journal article supplement (doi:10.1101/gr.139725.112), 2012-06-21
Supplement: File_S1.docx [file File_S1.docx]

**File S1 – Supplementary Methods**

For:

**Extensive Conservation of Ancient Microsynteny across Metazoans due to *cis*-regulatory Constraints**

Manuel Irimia, Juan J. Tena, Maria S. Alexis, Ana Fernandez-Miñan, Ignacio Maeso, Ozren Bogdanović, Elisa de la Calle-Mustienes, Scott W. Roy, José L. Gómez-Skarmeta and Hunter B. Fraser

**Supplementary Methods**

*Genomic sources*

We downloaded the full protein sequence sets and genome annotations for the 13 species that were used to obtain the ancient gene pairs: *Homo sapiens* hg19, *Gallus gallus* WASHUC2, *Xenopus tropicalis* JGI_4.2, *Ciona intestinalis* JGI2, *Drosophila melanogaster* BDGP5.25.60, *Caenorhabditis elegans* WS220, from Ensembl (<http://www.ensembl.org/index.html>); v1.0 of the genomes of *Trichoplax adhaerens*, *Nematostella vectensis*, *Lottia gigantea*, *Capitella teleta* and *Daphnia pulex* from JGI (<http://genome.jgi-psf.org/euk_home.html>); *Strongylocentrotus purpuratus* Spur_3.1 at NCBI (http://www.ncbi.nlm.nih.gov/genomes/leuks.cgi); for the amphioxus *Branchiostoma floridae*, we used the information from both assemblies v2.0 at NCBI and v1.0 at JGI (refer to as Bfl and Bf in Table S2, respectively), and only a single copy of duplicated haplotypes was kept for v1.0.

We also used the following genomic sources for secondary analyses: genomic sequence assemblies for *Saccoglossus kowalevskii* 2008-Dec-09 scaffolds from HGSC Baylor College of Medicine (<http://blast.hgsc.bcm.tmc.edu/blast.hgsc?organism=20>), and *Oikopleura dioica* v3, *Amphimedon queenslandica* v1.0, *Capsaspora owczarzaki ATCC 30864* v1.0 from NCBI, and whole genome annotations and full protein sets for *Mus musculus* mm9, *Monodelphis domestica* BROADO5, *Takifugu rubripes* FUGU4, *Danio rerio* Zv8 from Ensembl.

*Curation of the unique dataset of ancient microsyntenic gene pairs*

In order to assess whether the groups were formed by pairs of paralogous or non-paralogous genes, the genes in each pair were compared by blast2seq, with p < 10-5 and without filtering for low complexity sequences (-F F). If any of the pairs within a group had a significant blast2seq hit, the whole group was considered “paralogous”.

In addition, we applied the following two filters: (i) if the two genes of a pair had the same human gene as best hit and they were not paralogous according to blast2seq analyses, they were discarded. (A common artifact in poorly annotated genomes is that long genes are split into different gene models. Therefore, if this artifact occurs in ≥4 poorly annotated genomes, it could be detected as a ‘conserved’ pair – e.g. the gene *titin*, which encodes a protein of 26,926 aa in humans). (ii) back-blast consistency with human and/or fly for all species: all genes were required to have the same best hit in humans (or one of the ohnologs, i.e. the gene copies resulting from the two rounds of whole genome duplication) or in flies.

*Analysis of paralogous gene pairs*

To assess whether the paralogous gene pairs may be resulting from independent tandem duplications or were already present in the common ancestor, we generated automatic ClustalW protein alignments for each of the 110 paralogous groups (IDs 595-704 in Table S2) and used them to build phylogenetic trees with MrBayes 3.1.2 ([Huelsenbeck, Ronquist 2001](#_ENREF_3); [Ronquist, Huelsenbeck 2003](#_ENREF_5)) using two independent runs (each with four chains) and JTT as evolutionary model. 1,000,000 generations were run for each alignment and the first 100,000 were discarded when building the consensus tree. We then analyzed tree topology using two complementary scores. In one extreme, if each gene pair in each species originated independently by tandem gene duplication, genes from the same species will be grouped together in the tree. Thus, all terminal nodes in the tree should correspond to a pair of genes of the same species. We defined this case as Apical Similarity (AS) of 1 (AS=#terminal nodes with genes of same species/#total terminal nodes). Alternatively, if the pairs in all species were the product of one ancestral tandem duplication, then, ideally, none of the terminal nodes would be composed by genes of the same species, and thus AS=0. Complementarily, and following the same reasoning, in the case of multiple pairs per species, the more grouped each species’ genes are in the tree, the higher the support for independent origins. We defined the Group Score (GS) as the fraction of neighbor genes in the tree that belong to the same species. In order to obtain p-values for these scores, we generated 10,000 randomizations for each tree (shuffling gene positions while keeping the same tree topology) and calculated their corresponding AS and GS (Table S3). If both AS and GS had a p-value < 0.05, we considered the pair likely to have been originated, at least partially, by independent tandem gene duplications.

*Phylogenetic analyses of microsynteny disruption*

Unique groups of non-paralogous conserved pairs (i.e. CAMPs, IDs 0-594, Table S2) were searched in *S. kowalevskii*, *O. dioica*, *A. queenslandica* and *C.* *owczarzaki* genomes using tBLASTN against the assembled contigs. Sequences from all pairs within each group were used. The pair was considered conserved in any of the four species if both proteins from a given species had any of the best two tBLASTN hits in the same scaffold at a distance shorter than 150 Kbp (for *S. kowalevskii*), 50 Kbp (for *A. queenslandica* and *C.* *owczarzaki*) or 30 Kbp (*O. dioica*). With this information we then constructed a presence/absence matrix for the 17 species and applied parsimony to infer the minimum number of CAMPs that were present at each node of a consensus phylogenetic tree. We also estimated branch lengths for CAMP disruption as the number of losses along the branch out of the inferred number of pairs in its most proximal ancestral node. Note that these values are likely underestimating the length of the terminal branches in detriment of the internal ones, since recurrent losses in terminal branches are very likely to occur and would be considered as a single loss in the last common ancestor by parsimony. In addition, some species genome assemblies are more fragmented than others (Table S1), which will result in longer branch lengths for poorly assembled genomes.

*ChIP-Seq for histone modifications in zebrafish embryos*

Chromatin immunoprecipitation (ChIP) was performed following the protocol described in ([Wardle et al. 2006](#_ENREF_8)) with minor modifications. We used 1000 embryos from 24hpf stage. The samples were sonicated using the Diagenode Bioruptor device with the following cycling conditions: 15min high - 30 sec on, 30 sec off; 15 min on ice; 15min high -30 sec on, 30 sec off. The size of sonicated DNA was in the range of 100-500 bp. The anti-H3K4me1 (CS-037-100) and anti-H3K4me3 (pAB-033-050) antibodies were obtained from Diagenode. The anti-H3K27me3 (07-449) antibody was purchased from Millipore. Immunoprecipitated DNA was purified with QIAquick columns (Qiagen). The DNA ends were repaired, and the adaptors ligated. The size-selected (300 bp) library was then amplified in a PCR reaction and sequenced using the Genome Analyzer (Illumina). The sequenced reads were mapped to the reference zebrafish genome (ENSEMBL version Zv8) with the ELAND (v.2) software.

*Transgenic reporter assays in zebrafish*

For each tested H3K4me1-positive peak, we designed primers to span the whole region plus a padding of ~100nt at each side (primer sequences are available at Table S5). We performed PCRs on zebrafish genomic DNA using iProof™ High-Fidelity DNA Polymerase (Bio-Rad). We cloned amplicons in pCR8GW/TOPO vector (Invitrogen) according to manufacturer. We then transferred sequence-verified clones with the Gateway recombination system (Invitrogen) to the ZED vector ([Bessa et al. 2009](#_ENREF_1)). We purified the final transgenic constructs using phenol-chlorophorm and normalized at 50 ng/ml in DEPC water prior to microinjection. Zebrafish transgenic embryos were generated using the Tol2 transposon/transposase method ([Kawakami 2004](#_ENREF_4)) with minor modifications. One-cell embryos were injected with 2nl of an injection solution composed of 25ng/ul of transposase mRNA, 20ng/ul of phenol/chloroform-purified ZED constructs and 0.05% phenol red. Three or more independent stable transgenic lines were generated for each construct.

For embryonic gene expression analysis, we fixed zebrafish embryos at different stages in 4% paraformaldehyde overnight at 4 °C, and we carried out *in situ* hybridizations as previously described ([Tena et al. 2007](#_ENREF_7)). For inmunostaining, zebrafish embryos were fixed with 4% paraformaldehyde at 24 and 48 hpf. After washing in PBS + 0.2% Triton X100 (PBS-T), embryos were incubated with anti-Islet antibody (39.4D5, Hybridoma Bank) at 1:500 dilution for three hours. The antibody was washed with PBS-T overnight, and the secondary antibody (anti-mouse Alexa647, Invitrogen) was subsequently added in a 1:800 dilution. After 3 hours of incubation, the antibody was exhaustively washed in PBS-T. Finally, samples were stained with DAPI, mounted in Vectashield (VectorLabs) and visualized in the confocal microscopy.

*Chromosome conformation capture (3C) in zebrafish*

3C assays were performed as referred in ([Hagège et al. 2007](#_ENREF_2); [Tena et al. 2011](#_ENREF_6)). Dome (N=5000), 80% epiboly (N=3000) and 24 hpf-stage (N=1000) embryos were processed to obtain single cell preparations. Cells were then fixed with 2% paraphormaldehyde and lysed, and nuclei were digested with HindIII endonuclease (Roche). Subsequently, DNA was ligated with T4 DNA ligase (Promega). A set of locus-specific primers (Table S5) was designed to perform qPCRs to measure relative enrichment in each ligation product. Negative control primers were designed ~30 Kbp upstream and downstream the regions of interest. The quality of all primer pairs was measured using serial dilutions of a control DNA composed of two BACs that encompass the whole *otx1b*-*ehbp1* region (CH73-38F7, CH73-59P12), and other two for the *hey2-hddc2* region (CH73-232C8, CH73-160B6). PCR values were normalized by means of control primers designed in the *Ercc3* gene locus.

**References**

Bessa, J, JJ Tena, E de la Calle-Mustienes, A Fernández-Miñán, S Naranjo, A Fernández, L Montoliu, A Akalin, B Lenhard, F Casares*, et al.* 2009. Zebrafish enhancer detection (ZED) vector: a new tool to facilitate transgenesis and the functional analysis of cis-regulatory regions in zebrafish. *Dev Dyn* **238**:2409-2417.

Hagège, H, P Klous, C Braem, E Splinter, J Dekker, G Cathala, W de Laat, T Forné. 2007. Quantitative analysis of chromosome conformation capture assays (3C-qPCR). *Nat Protoc* **2**:1722-1733.

Huelsenbeck, JP, F Ronquist. 2001. MRBAYES: Bayesian inference of phylogenetic trees. *Bioinformatics* **17**:754-755.

Kawakami, K. 2004. Transgenesis and gene trap methods in zebrafish by using the Tol2 transposable element. *Methods Cell Biol* **77**.

Ronquist, F, JP Huelsenbeck. 2003. MrBayes 3: Bayesian phylogenetic inference under mixed models. *Bioinformatics* **19**:1572-1574.

Tena, JJ, ME Alonso, E de la Calle-Mustienes, E Splinter, W de Laat, M Manzanares, JL Gómez-Skarmeta. 2011. An evolutionarily conserved three-dimensional structure in the vertebrate Irx clusters facilitates enhancer sharing and co-regulation. *Nat Commun* **In press**.

Tena, JJ, A Neto, E de la Calle-Mustienes, C Bras-Pereira, F Casares, JL Gomez-Skarmeta. 2007. Odd-skipped genes encode repressors that control kidney development. *Dev Biol* **301**:518-531.

Wardle, FC, DT Odom, GW Bell, B Yuan, TW Danford, EL Wiellette, E Herbolsheimer, HL Sive, RA Young, JC Smith. 2006. Zebrafish promoter microarrays identify actively transcribed embryonic genes. *Genome Biol* **7**:R71.
