# Supplementary material for: Extensive conservation of ancient microsynteny across metazoans due to cis-regulatory constraints
Source: HighWire-hosted journal article supplement (doi:10.1101/gr.139725.112), 2012-06-21
Supplement: SuppLegends.docx [file SuppLegends.docx]

**Supplementary Files**

**File S1 – Supplementary Methods**

**Figure S1 – Example of convergently evolved paralogous pairs**

A) Example of a group of genes likely resulted by independent tandem gene duplication (*c16orf5*). Abbreviations: Bfl, *Branchiostoma floridae*; Lgi, *Lottia gigantea*; Cte, *Capitella teleta*; Dme, *Drosophila melagonaster*; Tad, *Trichoplax adhaerens*; Cel, *Caenorhabditis elegans*.

**Figure S2 – Coexpression analysis for 27 fly gene pairs**

A) Cumulative plot of ranks of ranked correlation coefficients of conserved pairs among the control dataset (non-conserved neighbor pairs with the same orientation and similar intergenic distance). The red line shows the expected cumulative pattern if co-expression was similar to the controls, and the area above the line the excess of highly co-expressed pairs. D) Percentage of conserved pairs with ranks in each of the decimal bins. The red line (10%) indicates the expected values. Conserved pairs were significantly enriched in ranks of the last decimal bin (91-100).

**Figure S3 – Coexpression of endogenous ISL and GFP driven by a *scaper2a*-contained enhancer**

A) Expression of GFP (green), Islet (red) and coexpression (merge, right panel) in motoneurons (arrows) and sensory Rohon-Beard cells (arrow heads). B) Expression of GFP (green), Islet (red) and coexpression (merge, right panel) in neurons in the basal ganglia (arrows).

**Figure S4 – Pairwise conservation of syntenic pairs between human and each of the studied species**

Histogram of the percentage of conserved pairs between human and the other 12 species, and also mouse, opossum and fugu, suggesting that rearrangements seem to have reached saturation in pairwise comparisons with invertebrate comparisons, but not within vertebrates (and were thus considered as a single lineage in this study). Mmu, *Mus musculus*; Mdo, *Monodelphis domestica*; Gga, *Gallus gallus*; Xtr, *Xenopus tropicalis*; Tru, *Takifugu rubripes*; Cin, *Ciona intestinalis*; Bfl, *Branchiostoma floridae*; Spu, *Strongylocentrotus purpuratus*; Lgi, *Lottia gigantea*; Cte, *Capitella teleta*; Dme, *Drosophila melagonaster*; Cel, *Caenorhabditis elegans*; Nve, *Nematostella vectensis*; Tad, *Trichoplax adhaerens*.

**Figure S5 – Conserved pairs using different cutoffs for the maximum number of intervening genes.**

Relative number of total conserved pairs (including related and unrelated pairs/groups) in three representative species (human, black; Drosophila, red; and Nematostella, blue) using different cutoffs for the number of maximum intervening genes allowed (from 0 to 10; 4 was used in this study). For each species, all numbers are in relation to the number of pairs obtained for 10 intervening genes.

**Table S1 – Conservation of microsynteny in the different species**

This table shows the total number of conserved pairs for each species (pre-filtering), the number of conserved non-related gene pairs (post-filtering) and the expected number of pairs conserved by chance to ≥ 2 and ≥ 3 other lineages, based on gene order randomizations, and the corresponding false discovery rate (FDR) for the cutoffs in this study. The last column shows the total number of chromosomes/scaffolds in each genome assembly and the number of them that consists of a single gene (singletons).

**Table S2 – Full dataset of microsyntenic pairs identified in this study.**

This table contains different features for the 795 (column “i”) types of pairs in all species where a type is present. These include: gene model/ids, number of intervening genes between the pair, total number of species in which it is conserved, orientation, fraction of orientation conservation (“Same-Ori”), most common orientation (per group “i”), whether the orientation is conserved, intergenic distance between the gene models, best D. melanogaster and human blast hits, type of pair (“OK”, a simple pair of two genes whose orthology could be confidently assigned; “DEV CL”, group of related *trans-dev* genes; “SUPER”, groups of related genes whose orthology could not be confidently assigned), whether the pair of genes are related by sequences (“Paral/No”), the sequence for both gene models in each species (separated by “XXX”), and data for tblastN searches in *A. queenslandica*, *C. owczarzaki*, *O. dioica* and *S. kowalevskii* (if positive hit: scaffold, orientation of the pair, minimum intergenic distance).

Abbreviations: Hsa, *Homo sapiens*; Gga, *Gallus gallus*; Xtr, *Xenopus tropicalis*; Cin, *Ciona intestinalis*; Odi, *O. dioica*, Bfl, *Branchiostoma floridae*; Spu, *Strongylocentrotus purpuratus*; Lgi, *Lottia gigantea*; Cte, *Capitella teleta*; Dme, *Drosophila melagonaster*; Cel, *Caenorhabditis elegans*; Nve, *Nematostella vectensis*; Tad, *Trichoplax adhaerens*; Aqu, *A. queenslandica*, Cow, *C. owczarzaki*.

**Table S3 – Analyses of pairs of paralogous genes**

Each group of pairs of paralogous genes was analysed as described in Methods and the two defined scores (Apical Similarity (AS) and Group Score (GS)), and the corresponding p-values based on randomizations are given for each case. If both scores where significantly different than the random controls, the pair was annotated as likely to have been originated independently in each species by tandem duplications (“INDEPENDENT DUP”).

**Table S4 – Putative human GRBs identified in this study**

This table shows the pairs formed by a *trans-dev* and a non-developmental gene, as defined by GO categories. For each pair, the following features are given: number of intervening genes, total number of species in which the pair is present (“cons #sp”), orientation and whether it is conserved (“OriCONS”), intergenic distance, correlation of expression between the pairs (“CorrMAX”), whether the first or the second gene is the *trans-dev* (DEV) and different intron features for each of the genes (intron number, intron average, and number of introns longer than 10, 50 or 100Kbp).

**Table S5 – Primer sequences in this study**
