# Supplementary material for: Extensive conservation of ancient microsynteny across metazoans due to cis-regulatory constraints
Source: HighWire-hosted journal article supplement (doi:10.1101/gr.139725.112), 2012-06-21
Supplement: TableS1.xlsx [file TableS1.xlsx]

## Sheet: TableS1
Species	Pre-filtered	Randomized genomes (average)			Phylogenetically	#scaffolds
	Conserved pairs	Conserved in 2 taxa	Conserved in 3 taxa	FDR per pair	unrelated pairs	(singletons)
Homo sapiens	600	2.67	0	0	359	60 (16)
Gallus gallus	414	2.37	0	0	299	52 (5)
Xenopus tropicalis	591	1.85	0	0	263	2542 (1074)
Ciona intestinalis	197	2.37	0.01	5.07614e-05	54	1628 (1025)
Branchiostoma floridae	842	4.88	0	0	492	391 (8)
Strongylocentrotus purpuratus	478	2.17	0.01	2.09205e-05	267	12733 (9175)
Caenorhabditis elegans	205	4.38	0.01	4.87805e-05	12	7 (1)
Drosophila melanogaster	349	5.51	0.06	0.00017192	46	14 (0)
Daphnia pullex	374	2.58	0.01	2.6738e-05	114	3000 (1798)
Capitella teleta	646	5.23	0.03	4.64396e-05	408	7282 (4826)
Lottia gigantea	745	3.81	0.03	4.02685e-05	448	1597 (993)
Nematostella vectensis	452	4.07	0.03	6.63717e-05	200	4097 (2666)
Trichoplax adhaerens	371	1.82	0.01	2.69542e-05	266	567 (392)
