# Supplementary material for: Extensive conservation of ancient microsynteny across metazoans due to cis-regulatory constraints
Source: HighWire-hosted journal article supplement (doi:10.1101/gr.139725.112), 2012-06-21
Supplement: TableS3.xlsx [file TableS3.xlsx]

## Sheet: Table S2
Group Id	Best human blast hit	AS	#apex	p-val	Sign	GS	#counts	p-val	Sign	Evid
603	mosc2-mosc1	1	4	0.0006	*	1	4	0.0006	*	INDEPENDENT DUP
641	slc26a11-slc26a11	1	3	0.0017	*	1	3	0.0017	*	INDEPENDENT DUP
646	qrsl1-qrsl1	1	4	0.0046	*	0.888889	9	0	*	INDEPENDENT DUP
616	c16orf5-c16orf5	1	6	0.0002	*	0.857143	14	0	*	INDEPENDENT DUP
642	unc93a-unc93a	1	5	0.0005	*	0.857143	7	0.0005	*	INDEPENDENT DUP
653	arrdc3-arrdc3	1	7	0	*	0.842105	19	0	*	INDEPENDENT DUP
622	apod-apod	1	5	0	*	0.833333	6	0.0006	*	INDEPENDENT DUP
630	wscd1-wscd1	1	5	0.0002	*	0.8	10	0.0001	*	INDEPENDENT DUP
639	ms4a8b-ms4a4a	1	4	0.0036	*	0.8	10	0.0002	*	INDEPENDENT DUP
648	phyh-phyh	1	10	0	*	0.8	15	0	*	INDEPENDENT DUP
656	phex-ece1	1	7	0	*	0.8	10	0	*	INDEPENDENT DUP
686	panx1-panx1	1	3	0.0101	*	0.8	5	0.0101	*	INDEPENDENT DUP
687	hltf-ttf2	1	3	0.0089	*	0.8	5	0.0089	*	INDEPENDENT DUP
689	smox-smox	1	3	0.0093	*	0.8	5	0.0093	*	INDEPENDENT DUP
690	hpgd-hpgd	1	3	0.009	*	0.8	5	0.009	*	INDEPENDENT DUP
691	slc25a34-slc25a34	1	3	0.0106	*	0.8	5	0.0105	*	INDEPENDENT DUP
700	rhcg-rhcg	1	3	0.0098	*	0.8	5	0.0098	*	INDEPENDENT DUP
617	ppib-ppib	1	7	0	*	0.777778	9	0.0002	*	INDEPENDENT DUP
618	capsl-capsl	1	7	0.0002	*	0.777778	18	0	*	INDEPENDENT DUP
619	mgat4c-mgat4c	1	4	0.0007	*	0.777778	9	0	*	INDEPENDENT DUP
652	comt-comt	1	4	0.0011	*	0.777778	9	0	*	INDEPENDENT DUP
595	znf503-znf703	1	2	0.0626		0.75	4	0.0265	*
674	hspa8-hspa6	1	5	0.0002	*	0.75	8	0.0002	*	INDEPENDENT DUP
643	chdh-chdh	1	8	0	*	0.73913	23	0	*	INDEPENDENT DUP
596	gbap-gba	1	5	0	*	0.714286	7	0.0013	*	INDEPENDENT DUP
660	bbox1-bbox1	1	4	0.003	*	0.714286	7	0.0093	*	INDEPENDENT DUP
664	tpmt-tpmt	1	4	0.0012	*	0.714286	7	0.0051	*	INDEPENDENT DUP
679	slc3a1-slc3a1	1	4	0.0025	*	0.714286	7	0.0095	*	INDEPENDENT DUP
685	crisp3-pi16	1	4	0.0009	*	0.714286	7	0.005	*	INDEPENDENT DUP
699	slc1a3-slc1a3	1	4	0.0032	*	0.714286	7	0.011	*	INDEPENDENT DUP
701	pipox-pipox	1	4	0.0009	*	0.714286	7	0.0044	*	INDEPENDENT DUP
702	grhpr-grhpr	1	4	0.0006	*	0.714286	7	0.0006	*	INDEPENDENT DUP
703	gal3st1-gal3st1	1	4	0.0011	*	0.714286	7	0.0054	*	INDEPENDENT DUP
651	gpx3-gpx3	1	4	0.001	*	0.714286	7	0.004	*	INDEPENDENT DUP
655	aldh1a1-aldh1b1	1	5	0.0004	*	0.7	10	0.0009	*	INDEPENDENT DUP
634	acy1-acy1	1	6	0.0002	*	0.692308	13	0	*	INDEPENDENT DUP
635	lct-lct	1	6	0	*	0.684211	19	0	*	INDEPENDENT DUP
613	fahd2b-fahd2a	1	4	0.0007	*	0.666667	9	0.0004	*	INDEPENDENT DUP
654	frrs1-frrs1	1	7	0	*	0.666667	15	0	*	INDEPENDENT DUP
665	amy1c-amy2a	1	5	0	*	0.666667	12	0	*	INDEPENDENT DUP
666	slc46a1-slc46a1	1	6	0	*	0.666667	12	0.0001	*	INDEPENDENT DUP
668	ppp1r3d-ppp1r3b	1	3	0.0076	*	0.666667	6	0.0043	*	INDEPENDENT DUP
688	glipr2-glipr2	1	4	0.0005	*	0.666667	9	0.0005	*	INDEPENDENT DUP
607	pla2g1b-pla2g1b	1	9	0	*	0.647059	17	0.0001	*	INDEPENDENT DUP
682	c6orf192-c6orf192	1	4	0.0006	*	0.625	8	0.0045	*	INDEPENDENT DUP
633	otop3-otop3	1	7	0	*	0.611111	18	0	*	INDEPENDENT DUP
611	slc23a1-slc23a2	1	5	0	*	0.6	10	0.0003	*	INDEPENDENT DUP
623	ranbp2-ranbp2	1	5	0.0029	*	0.6	15	0.0486	*	INDEPENDENT DUP
627	glra1-glra2	1	4	0.001	*	0.6	10	0.0078	*	INDEPENDENT DUP
629	adam32-adam18	1	3	0.0035	*	0.6	5	0.0035	*	INDEPENDENT DUP
658	moxd1-moxd1	1	3	0.004	*	0.6	10	0.0005	*	INDEPENDENT DUP
662	sfrs7-sfrs7	1	4	0.0003	*	0.6	10	0.0004	*	INDEPENDENT DUP
670	acsl5-acsl5	1	3	0.0087	*	0.6	5	0.1224
697	xkr6-xkr6	1	2	0.0285	*	0.6	5	0.0284	*	INDEPENDENT DUP
704	hexb-hexb	1	3	0.0082	*	0.6	5	0.1192
667	alox15b-alox5	1	5	0	*	0.583333	12	0.0003	*	INDEPENDENT DUP
649	hsd17b12-hsd17b12	1	4	0.001	*	0.571429	7	0.1074
614	epdr1-epdr1	1	4	0.0019	*	0.555556	9	0.0189	*	INDEPENDENT DUP
650	slc5a7-slc5a7	1	3	0.0034	*	0.555556	9	0.0013	*	INDEPENDENT DUP
694	fut9-fut4	1	6	0	*	0.538462	13	0.0103	*	INDEPENDENT DUP
698	ckb-ckb	1	4	0.0005	*	0.444444	9	0.0194	*	INDEPENDENT DUP
673	heph-cyp11a1	1	2	0.0279	*	0.4	5	0.1414
681	tagln2-cnn1	1	3	0.0019	*	0.333333	9	0.0111	*	INDEPENDENT DUP
606	plscr1-plscr5	0.888889	9	0	*	0.846154	13	0	*	INDEPENDENT DUP
710	hes5-hes5	0.875	16	0	*	0.833333	30	0	*	INDEPENDENT DUP
661	stom-stom	0.875	8	0	*	0.6875	16	0.0004	*	INDEPENDENT DUP
669	mpst-tst	0.857143	7	0	*	0.75	8	0	*	INDEPENDENT DUP
640	abcb1-abcb1	0.846154	13	0	*	0.64	25	0	*	INDEPENDENT DUP
620	ascl1-ascl1	0.833333	6	0.0006	*	0.545455	11	0.0543
647	faah-faah	0.8	5	0.0031	*	0.75	8	0.0018	*	INDEPENDENT DUP
696	mfsd6-mfsd6	0.8	5	0.0008	*	0.714286	7	0.0003	*	INDEPENDENT DUP
675	ace2-ace	0.8	5	0.0012	*	0.625	8	0.0008	*	INDEPENDENT DUP
684	kcnk5-kcnk16	0.8	5	0.0006	*	0.454545	11	0.0834
637	mmp13-mmp13	0.777778	9	0	*	0.375	24	0.0784
612	npr2-npr1	0.75	4	0.0109	*	0.444444	9	0.0385	*	INDEPENDENT DUP
663	dpep1-dpep1	0.75	4	0.0048	*	0.444444	9	0.2225
692	mapk14-mapk14	0.75	4	0.0054	*	0.444444	9	0.0289	*	INDEPENDENT DUP
693	hk1-hk1	0.75	4	0.0057	*	0.444444	9	0.0172	*	INDEPENDENT DUP
605	dmrt3-dmrt2	0.75	4	0.0062	*	0.375	8	0.0363	*	INDEPENDENT DUP
678	calm1-calm3	0.75	4	0.0077	*	0.375	8	0.0195	*	INDEPENDENT DUP
680	itih4-itih5l	0.714286	7	0	*	0.692308	13	0.0001	*	INDEPENDENT DUP
632	abca10-abca9	0.666667	6	0.0024	*	0.5	14	0.0099	*	INDEPENDENT DUP
631	guca1b-guca1a	0.666667	6	0.0004	*	0.454545	11	0.0001	*	INDEPENDENT DUP
624	mcfd2-mcfd2	0.666667	3	0.0432	*	0.428571	7	0.1366
638	galnt6-galnt6	0.6	5	0.0146	*	0.5	10	0.0345	*	INDEPENDENT DUP
609	ak3-akd1	0.6	5	0.019	*	0.384615	13	0.059
645	rgs4-rgs3	0.555556	9	0.0029	*	0.55	20	0	*	INDEPENDENT DUP
625	en2-en1	0.5	2	0.2561		0.4	5	0.1399
610	znf474-znf474	0.5	2	0.212		0.285714	7	0.1116
676	nol4-c20orf112	0.5	2	0.2551		0.2	5	1
709	tbx4-tbx2	0.454545	11	0.0013	*	0.416667	24	0.0019	*	INDEPENDENT DUP
599	cdy2a-ac009976	0.4	5	0.0792		0.230769	13	0.9989
659	pdlim3-ldb3	0.333333	3	0.3514		0.4	5	0.3514
600	tmc6-tmc8	0.333333	6	0.1782		0.357143	14	0.3482
604	samd5-sash1	0.333333	3	0.2454		0.333333	9	0.1748
626	mif-mif	0.333333	3	0.2862		0.285714	7	0.2058
644	popdc3-bves	0.333333	3	0.2711		0.285714	7	0.2711
706	six1-six4	0.333333	9	0.0504		0.266667	15	0.0455	*
677	cacng5-cacng5	0.333333	3	0.2468		0.2	5	0.2468
636	rapgef6-rapgef2	0.333333	3	0.2935		0.142857	7	0.9994
628	sp8-sp4	0.25	8	0.1407		0.315789	19	0.872
608	ccng2-ccni	0.25	4	0.2139		0.2	5	0.2139
707	irx5-irx6	0.222222	9	0.2086		0.388889	18	0.059
597	gpc4-gpc3	0.166667	6	0.6035		0.166667	6	0.6035
708	wnt9a-wnt3a	0.0666667	15	0.7733		0.235294	34	0.4572
657	dtx3l-parp9	0	4	1		0.272727	11	0.9987
601	nphs1-kirrel2	0	3	1		0.222222	9	1
602	epb41l4b-ptpn3	0	5	1		0.222222	9	0.8563
683	cacng1-cacng7	0	2	1		0.2	5	1
695	pcgf2-bmi1	0	3	1		0.142857	7	1
672	nrcam-pnpla8	0	2	1		0.111111	9	1
598	cebpa-cebpg	0	3	1		0	4	1
615	mpdz-mpdz	0	1	1		0	1	1
621	mctp1-esyt3	0	2	1		0	5	1
671	wdr90-wdr90	0	2	1		0	3	1
