# Supplementary material for: Extensive conservation of ancient microsynteny across metazoans due to cis-regulatory constraints
Source: HighWire-hosted journal article supplement (doi:10.1101/gr.139725.112), 2012-06-21
Supplement: TableS4.xlsx [file TableS4.xlsx]

## Sheet: Table S3
i	j	Pair	Pair names	Intervening	cons #sp	Orientation	OriCONS	Intergenic distance	CorrMAX	DEV1	DEV2	G1-#int	G1-aver	G1->10	G1->50	G1->100	G2-#int	G2-aver	G2->10	G2->50	G2->100
1	0	ENSG00000159556-ENSG00000140386	ISL2-SCAPER	0	9	3'-3'	NO	6804	-0.0734	DEV	No	5	775.4	0	0	0	30	17700.3	16	1	0
3	0	ENSG00000172915-ENSG00000180660	NBEA-MAB21L1	0	8	3'-3'	NO	-195926	0.3619	No	DEV	57	12620.8	21	4	0	0	0	0	0	0
	1	ENSG00000198589-ENSG00000181541	LRBA-MAB21L2	0	8	5'-5'	NO	-431612	0.0114	No	DEV	56	13221.2	17	5	0	0	0	0	0	0
5	0	ENSG00000115504-ENSG00000115507	EHBP1-OTX1	0	7	3'-5'	NO	7494	-0.1165	No	DEV	23	14549.4	7	2	0	2	1131.5	0	0	0
6	0	ENSG00000109083-ENSG00000109079	IFT20-TNFAIP1	0	7	5'-5'	NO	7301	0.3787	No	DEV	4	705.25	0	0	0	5	826.6	0	0	0
7	0	ENSG00000164104-ENSG00000164105	HMGB2-SAP30	0	7	5'-5'	YES	37534	0.557	DEV	No	3	314.333	0	0	0	3	1828.33	0	0	0
8	1	ENSG00000136450-ENSG00000121083	SRSF1-DYNLL2	0	7	5'-5'	NO	79954		DEV	No	3	329.333	0	0	0	1	1920	0	0	0
11	0	ENSG00000170122-ENSG00000172785	FOXD4-CBWD1	0	7	5'-3'	NO	3351	-0.1592	DEV	No	0	0	0	0	0	14	3945.43	2	0	0
	1	ENSG00000184659-ENSG00000147996	FOXD4L4-CBWD5	0	7	5'-3'	NO	3533		DEV	No	0	0	0	0	0	14	3955.07	2	0	0
	2	ENSG00000204793-ENSG00000204790	FOXD4L6-CBWD6	0	7	5'-3'	NO	3354		DEV	No	0	0	0	0	0	14	3946.86	2	0	0
	3	ENSG00000215126-ENSG00000204828	CBWD7-FOXD4L2	0	7	5'-3'	NO	3533		No	DEV	10	4190.2	2	0	0	0	0	0	0	0
14	0	ENSG00000140986-ENSG00000140990	RPL3L-NDUFB10	0	7	5'-5'	NO	4994	0.0046	DEV	No	9	953.333	0	0	0	3	588.667	0	0	0
21	0	ENSG00000111906-ENSG00000135547	HDDC2-HEY2	0	6	5'-5'	NO	447845	0.082	No	DEV	5	5035.4	1	0	0	3	2358	0	0	0
23	0	ENSG00000130699-ENSG00000149657	TAF4-LSM14B	0	5	5'-5'	YES	56857	0.3947	DEV	No	16	5424.12	2	0	0	7	1377.71	0	0	0
26	0	ENSG00000078579-ENSG00000155970	FGF20-EFHA2	0	5	5'-5'	YES	25248	0.0434	DEV	No	2	4163.5	0	0	0	13	6916.62	1	0	0
	1	ENSG00000165487-ENSG00000102678	EFHA1-FGF9	0	5	5'-5'	YES	67765	0.0002	No	DEV	11	9964.18	3	0	0	2	14449	1	0	0
28	0	ENSG00000139318-ENSG00000139323	DUSP6-POC1B	0	5	5'-3'	NO	69117		DEV	No	2	821	0	0	0	11	9392.45	3	0	0
30	0	ENSG00000138107-ENSG00000107882	ACTR1A-SUFU	0	6	5'-5'	YES	1506	0.1848	No	DEV	10	2066.4	1	0	0	11	11323.5	3	0	0
32	0	ENSG00000006715-ENSG00000106536	VPS41-POU6F2	0	6	5'-5'	YES	97676		No	DEV	28	6442.57	6	0	0	9	50641	6	4	2
36	0	ENSG00000104848-ENSG00000104852	KCNA7-SNRNP70	0	6	5'-5'	NO	13830	0.176	No	DEV	1	1153	0	0	0	8	2590.38	0	0	0
37	0	ENSG00000183520-ENSG00000185668	UTP11L-POU3F1	0	6	3'-3'	NO	21766	0.0717	No	DEV	7	1438.71	0	0	0	0	0	0	0	0
39	0	ENSG00000111450-ENSG00000132341	STX2-RAN	0	6	5'-5'	NO	32938	0.4889	DEV	No	9	5149.44	1	0	0	6	439.5	0	0	0
40	0	ENSG00000114473-ENSG00000182899	IQCG-RPL35A	0	6	5'-5'	NO	5341	0.1046	No	DEV	9	6080.56	2	0	0	3	1492	0	0	0
46	1	ENSG00000172845-ENSG00000138430	SP3-OLA1	0	6	3'-5'	NO	110251	0.7116	DEV	No	6	8815.17	1	0	0	10	17106.3	4	1	0
	0	ENSG00000138430-ENSG00000217236	OLA1-SP9	0	6	5'-5'	NO	87364		No	DEV	10	17106.3	4	1	0	1	994	0	0	0
52	0	ENSG00000129255-ENSG00000129194	MPDU1-SOX15	0	5	3'-3'	YES	-4088	0.2314	No	DEV	7	422.286	0	0	0	1	598	0	0	0
56	1	ENSG00000173404-ENSG00000188559	INSM1-RALGAPA2	0	5	3'-3'	NO	23305		DEV	No	0	0	0	0	0	38	8162.26	7	1	0
57	0	ENSG00000185666-ENSG00000100234	SYN3-TIMP3	0	5	5'-5'	NO	-204659	0.0554	No	DEV	12	40936.5	5	3	1	4	14186.2	1	0	0
	10	ENSG00000157150-ENSG00000157152	TIMP4-SYN2	0	5	3'-3'	NO	-37104	0.175	DEV	No	4	1163.75	0	0	0	12	15361.4	3	1	1
	9	ENSG00000008056-ENSG00000102265	SYN1-TIMP1	0	5	5'-5'	NO	-37165	-0.086	No	DEV	12	3733.08	2	0	0	4	664	0	0	0
58	0	ENSG00000068383-ENSG00000148826	INPP5A-NKX6-2	0	5	3'-3'	NO	2812	-0.0303	No	DEV	14	17330	8	1	0	2	100.5	0	0	0
60	1	ENSG00000166923-ENSG00000186031	GREM1-FMN1	0	5	3'-3'	YES	43071	0.0737	DEV	No	0	0	0	0	0	17	22138.9	10	3	0
61	0	ENSG00000141376-ENSG00000121068	BCAS3-TBX2	0	5	3'-5'	NO	8055	0.2676	No	DEV	25	28391.8	15	3	1	6	1032.83	0	0	0
67	0	ENSG00000077514-ENSG00000054938	POLD3-CHRDL2	0	5	3'-3'	NO	55738	-0.161	No	DEV	11	4247.09	1	0	0	11	3004.18	1	0	0
68	0	ENSG00000181588-ENSG00000071655	MEX3D-MBD3	0	5	5'-3'	NO	10285	0.261	No	DEV	2	5364.5	1	0	0	5	2684.2	0	0	0
70	0	ENSG00000065320-ENSG00000170310	NTN1-STX8	0	5	3'-3'	YES	10616	0.097	DEV	No	5	43157	4	1	1	7	45442.6	6	2	2
79	0	ENSG00000125398-ENSG00000133195	SOX9-SLC39A11	0	5	3'-3'	YES	523201	0.213	DEV	No	2	734	0	0	0	8	55022.6	5	5	1
80	0	ENSG00000132842-ENSG00000085365	AP3B1-SCAMP1	0	5	5'-5'	YES	66093		DEV	No	26	11093	11	1	0	4	14441	2	0	0
81	0	ENSG00000136942-ENSG00000136950	RPL35-ARPC5L	0	4	5'-5'	NO	7379	0.7461	DEV	No	2	1400.5	0	0	0	3	2397	0	0	0
84	0	ENSG00000152484-ENSG00000122026	USP12-RPL21	0	5	5'-5'	YES	82138		No	DEV	8	5927.62	2	0	0	4	567.5	0	0	0
90	0	ENSG00000124422-ENSG00000109016	USP22-DHRS7B	0	5	5'-5'	YES	83933	0.2273	DEV	No	12	3186.58	1	0	0	6	10535	1	0	0
96	0	ENSG00000151532-ENSG00000148737	VTI1A-TCF7L2	0	5	3'-5'	NO	135377	0.2234	No	DEV	7	52480.6	5	3	2	13	16418.3	2	2	1
97	0	ENSG00000101665-ENSG00000141627	SMAD7-DYM	0	5	5'-3'	NO	93634	0.2305	DEV	No	3	9258.33	1	0	0	4	27005	3	0	0
101	0	ENSG00000127804-ENSG00000007168	METT10D-PAFAH1B1	0	5	5'-5'	YES	135958	0.6877	No	DEV	8	10085.1	3	0	0	9	4698.89	1	0	0
103	0	ENSG00000168944-ENSG00000151292	CEP120-CSNK1G3	0	5	5'-5'	YES	122666	0.604	DEV	No	19	3870.42	2	0	0	12	5614.75	2	0	0
109	0	ENSG00000171823-ENSG00000111186	FBXL14-WNT5B	0	5	5'-5'	YES	37289	0.0123	No	DEV	1	26063	1	0	0	3	4607	0	0	0
112	0	ENSG00000148297-ENSG00000148303	MED22-RPL7A	0	5	5'-5'	YES	1582	0.3614	No	DEV	3	1521	0	0	0	7	332.714	0	0	0
121	1	ENSG00000185624-ENSG00000141522	P4HB-ARHGDIA	0	5	5'-3'	NO	8408	0.7082	No	DEV	10	1494.3	0	0	0	4	111	0	0	0
122	0	ENSG00000197826-ENSG00000152785	C4orf22-BMP3	0	5	3'-5'	NO	67676	0.1753	No	DEV	5	125429	5	3	2	2	10417.5	1	0	0
127	0	ENSG00000163605-ENSG00000121440	PPP4R2-PDZRN3	0	5	3'-3'	NO	317649	0.131	No	DEV	8	8429.88	2	0	0	10	23911.2	2	1	1
129	0	ENSG00000174804-ENSG00000166575	FZD4-TMEM135	0	5	5'-5'	NO	82961	0.1881	DEV	No	1	2331	0	0	0	14	20137.5	5	3	0
132	0	ENSG00000054598-ENSG00000112699	FOXC1-GMDS	0	6	3'-3'	NO	12068	0.155	DEV	No	0	0	0	0	0	10	62014.4	6	4	4
133	0	ENSG00000007168-ENSG00000132361	PAFAH1B1-KIAA0664	0	5	3'-3'	NO	8798	0.4635	DEV	No	9	4698.89	1	0	0	24	418.792	0	0	0
134	0	ENSG00000130638-ENSG00000188064	ATXN10-WNT7B	0	4	3'-3'	NO	79681	0.0378	No	DEV	11	15426.5	5	1	0	3	17617.3	2	0	0
136	0	ENSG00000162298-ENSG00000204710	SYVN1-SPDYC	0	4	5'-5'	YES	36635		DEV	No	14	241.357	0	0	0	6	351	0	0	0
137	0	ENSG00000171530-ENSG00000132842	TBCA-AP3B1	0	4	5'-3'	NO	226648	0.582	No	DEV	3	28171.7	2	1	0	26	11093	11	1	0
140	0	ENSG00000108176-ENSG00000096717	DNAJC12-SIRT1	0	5	5'-5'	NO	46711	0.0937	No	DEV	4	10075.8	2	0	0	8	3704.38	1	0	0
142	0	ENSG00000134982-ENSG00000153037	APC-SRP19	0	4	3'-5'	NO	-1156	0.3644	DEV	No	14	5765.57	3	0	0	4	1432.5	0	0	0
151	0	ENSG00000107789-ENSG00000198682	MINPP1-PAPSS2	0	4	3'-5'	NO	107507	0.3393	DEV	No	2	23166.5	1	0	0	12	7011.75	2	0	0
153	0	ENSG00000112406-ENSG00000164440	HECA-TXLNB	0	4	3'-3'	YES	65427	0.068	DEV	No	3	13360	1	0	0	8	5540.88	1	0	0
162	0	ENSG00000147400-ENSG00000147383	CETN2-NSDHL	0	4	5'-5'	YES	15615	0.4792	No	DEV	4	588.75	0	0	0	6	3612.67	0	0	0
163	0	ENSG00000147655-ENSG00000104408	RSPO2-EIF3E	0	4	5'-3'	YES	119251	-0.3841	DEV	No	4	45209	3	2	0	12	3791	2	0	0
176	0	ENSG00000141985-ENSG00000167670	SH3GL1-CHAF1A	0	4	5'-5'	YES	2395	0.4136	DEV	No	8	4726.75	1	0	0	14	2671.86	0	0	0
178	0	ENSG00000164683-ENSG00000147586	HEY1-MRPS28	0	4	5'-3'	NO	151320	0.1854	DEV	No	4	391.25	0	0	0	2	55353.5	2	1	0
179	0	ENSG00000132646-ENSG00000101290	PCNA-CDS2	0	4	5'-5'	NO	7295	0.3276	DEV	No	5	747	0	0	0	12	5151.33	1	0	0
180	0	ENSG00000165304-ENSG00000196092	MELK-PAX5	0	4	3'-3'	NO	163198	-0.0891	No	DEV	16	5857.25	1	0	0	9	21367.2	5	0	0
183	0	ENSG00000120742-ENSG00000144895	SERP1-EIF2A	0	4	5'-5'	YES	668	0.7871	DEV	No	2	739.5	0	0	0	13	2720.31	0	0	0
187	0	ENSG00000109113-ENSG00000198242	RAB34-RPL23A	0	4	5'-5'	NO	1739	0.2378	No	DEV	10	268.4	0	0	0	5	619	0	0	0
188	0	ENSG00000114391-ENSG00000182504	RPL24-CEP97	0	4	5'-5'	NO	38001	0.2195	DEV	No	5	1014.6	0	0	0	11	3473.64	1	0	0
191	0	ENSG00000120129-ENSG00000113719	DUSP1-ERGIC1	0	4	5'-5'	NO	63462	0.483	DEV	No	4	288	0	0	0	9	12837.7	3	1	0
194	0	ENSG00000105173-ENSG00000105176	CCNE1-C19orf2	0	4	3'-5'	NO	118774	0.281	DEV	No	10	999.9	0	0	0	10	7092.4	3	0	0
196	0	ENSG00000196284-ENSG00000124813	SUPT3H-RUNX2	0	4	5'-5'	YES	-36978	0.1187	No	DEV	10	49212.4	6	3	2	8	27152.6	4	2	0
203	0	ENSG00000115211-ENSG00000115234	EIF2B4-SNX17	0	4	5'-5'	NO	430	0.6505	DEV	No	12	362.917	0	0	0	14	326.929	0	0	0
211	0	ENSG00000142168-ENSG00000156304	SOD1-SFRS15	0	4	3'-3'	YES	2827	0.3049	DEV	No	4	2087	0	0	0	20	1832.6	1	0	0
213	0	ENSG00000182473-ENSG00000129654	EXOC7-FOXJ1	0	4	5'-3'	YES	33664	0.2476	No	DEV	19	944.211	0	0	0	1	1778	0	0	0
214	0	ENSG00000162244-ENSG00000164086	RPL29-DUSP7	0	4	5'-3'	NO	55357	-0.1587	DEV	No	2	617.5	0	0	0	2	2147	0	0	0
218	0	ENSG00000214013-ENSG00000092529	GANC-CAPN3	0	4	3'-5'	NO	2270	0.1734	No	DEV	4	2178.75	0	0	0	24	1287.29	0	0	0
227	0	ENSG00000100997-ENSG00000101003	ABHD12-GINS1	0	4	5'-5'	YES	17118	0.2925	No	DEV	12	7877.33	2	1	0	5	3388.6	0	0	0
230	0	ENSG00000152192-ENSG00000152193	POU4F1-RNF219	0	4	5'-3'	NO	12257		DEV	No	1	653	0	0	0	5	8273	2	0	0
245	0	ENSG00000171865-ENSG00000171863	RNASEH1-RPS7	0	4	5'-5'	NO	17350	0.65	No	DEV	7	1660.29	0	0	0	5	938.6	0	0	0
247	0	ENSG00000112183-ENSG00000112186	RBM24-CAP2	0	4	3'-5'	NO	129427	0.6749	DEV	No	4	2479.75	0	0	0	11	12133.1	3	0	0
251	0	ENSG00000173575-ENSG00000182175	CHD2-RGMA	0	4	3'-3'	NO	20299	0.1393	No	DEV	37	3189.68	2	0	0	3	14194.7	2	0	0
253	0	ENSG00000105197-ENSG00000090932	TIMM50-DLL3	0	5	3'-5'	YES	9158	0.241	No	DEV	10	791.5	0	0	0	7	1027	0	0	0
255	0	ENSG00000206286-ENSG00000096150	VPS52-RPS18	0	4	5'-5'	YES	445		No	DEV	19	984.158	1	0	0	5	779.2	0	0	0
257	0	ENSG00000125492-ENSG00000125485	BARHL1-DDX31	0	5	3'-3'	NO	5350	0.3808	DEV	No	2	2871.5	0	0	0	19	3834.05	1	0	0
260	0	ENSG00000163681-ENSG00000136068	SLMAP-FLNB	0	4	3'-5'	NO	81180	0.391	No	DEV	21	7965.29	3	1	0	46	3355.26	2	1	0
265	0	ENSG00000120693-ENSG00000120697	SMAD9-ALG5	0	4	5'-3'	NO	70256	0.0785	DEV	No	5	5923	1	0	0	9	5377	2	0	0
281	4	ENSG00000205464-ENSG00000186468	ATP6AP1L-RPS23	0	4	5'-5'	YES	27079		No	DEV	3	4075.67	0	0	0	4	667.25	0	0	0
543	4	ENSG00000108518-ENSG00000108523	PFN1-RNF167	0	4	3'-3'	NO	890	0.5959	DEV	No	2	1037	0	0	0	8	382.75	0	0	0
557	0	ENSG00000134532-ENSG00000060982	SOX5-BCAT1	0	4	5'-3'	NO	868410	0.1809	DEV	No	14	29507.5	10	3	0	10	12977.4	4	0	0
558	2	ENSG00000135441-ENSG00000135424	BLOC1S1-ITGA7	0	5	5'-5'	YES	3867	0.0268	No	DEV	3	1033	0	0	0	26	730.462	0	0	0
559	4	ENSG00000135638-ENSG00000144040	EMX1-SFXN5	0	4	3'-3'	NO	11074	0.5053	DEV	No	2	8271.5	0	0	0	13	9667.23	7	0	0
560	2	ENSG00000114315-ENSG00000198836	HES1-OPA1	0	4	5'-3'	NO	444257	0.2142	DEV	No	3	337.667	0	0	0	29	3301.07	2	0	0
566	0	ENSG00000166436-ENSG00000166441	TRIM66-RPL27A	0	4	5'-5'	NO	31006	0.2066	No	DEV	18	1674.72	1	0	0	4	637.5	0	0	0
583	3	ENSG00000178307-ENSG00000109016	TMEM11-DHRS7B	0	4	3'-3'	YES	7177	0.3798	DEV	No	1	15251	1	0	0	6	10535	1	0	0
