# Supplementary material for: Extensive conservation of ancient microsynteny across metazoans due to cis-regulatory constraints
Source: HighWire-hosted journal article supplement (doi:10.1101/gr.139725.112), 2012-06-21
Supplement: TableS5.xlsx [file TableS5.xlsx]

## Sheet: Table S6
Primers transgenesis
Otx1b-E1	AACTTGCCTCAGGGCAGCAG	CCACATACTGGCGGCTGAAAC	-
Otx1b-E2a	tgaacactcccttgacactgaagc	GATCCAGCACTGGCCTTTGG	-
Otx1b-E2b	TTTGGCTGTGTGGAGATTTGG	TGTAAGGCATAATATGTGTGAGG	+
Hey2-Met1	CTGGGTTCACAAGCTGACAC	cattggcccttgaaacagag	+
Hey2-Met2	GGTAGTGGCCTGGTTGTACC	CATCTGATTTCCCTGTTACATTACG	+
Isl2a-E1	ATGGTTCAGGCTGGTGATGG	AACGAACGAACAAGCAAACG	-
Isl2a-E2	GCCTATATTTCTGAGGTAATCTGC	TACCTCAGTTGGTGCGGTAGGG	+
Isl2a-E3	TCCTCGCCTGTGTGAACAGC	TATGGCTGCACCATCTCAGC	-
Primers 3c
3c-qPCR-Hey2	CCCAAGTAATGTAGGCAATGTAGAC
3c-qPCR-enh1	ATCACACGCGCTTTCTCC
3c-qPCR-enh2	TTTATCCTGGACTGATACCACTAGG
3c-qPCR-enh3	AGAGTATCAATGTCAGTATCAGTGTCC
3c-qPCR-enh4	CGATCTTGACTACAAACATATCAGC
3c-qPCR-cont1	tgccctattcattaagaacattcc
3c-qPCR-cont2	CAAGCTGTAAATAGATGGCTTCAC
otx1b.1F	taaacctgcttgctgtttgg
otx1b.2F	gtgctcactctacggtgtattgg
otx1b.3F	gaaatgggaaagctgccata
otx1b.4F	aaagcccagttggagagtcc
otx1b-5F	aagccagtaaatgacagcagaag
otx1b.6F	tttggctgtgtggagatttg
otx1b.7F	ccgtcattcccttacaatgtc
anchor otx1b.F	ctcatctggctactattcgttacc
Primers in situ probes (PCR from cDNA)
Dr_scaper	gaactctccaaccgcttcc	gaggttccttggcattctcc
Dr_Ehbp1	cccatttgatgaacctgagc	gcggatagagaaccagatcc
Dr_Hddc2	TGGTTGATGTAACGGAATGG	GTGGAAACCAACCGTGTCG
